# Supplementary material
Source: Elsevier journal article supplement (https://www.sciencedirect.com/science/article/pii/S0034935622000597)

## MATERIAL SUPLEMENTARIO-1: Metodología.

De todas las **variables** registradas seleccionamos: sexo, edad, índice de masa corporal, antecedentes de trombosis o trastorno hemorrágico, tratamiento antiagregante o anticoagulante crónico, día de inicio de los síntomas, días de hospitalización hasta ingreso en UCI, APACHE II, escalas SOFA y CURB, relación  $\text{PaO}_2/\text{FiO}_2$ , datos de laboratorio (ferritina, proteína C reactiva, recuento linfocitario, relación proteína C reactiva/recuento linfocitario, lactato deshidrogenasa, plaquetas, aclaramiento de creatinina según ecuación de Cockcroft-Gault, dímero D), días de ventilación mecánica invasiva, maniobras de reclutamiento, sesiones de decúbito prono, tratamiento con relajantes neuromusculares, extracción extracorpórea de  $\text{CO}_2$ , técnicas de depuración extrarrenal, tratamientos (ritonavir-lopinavir, hidroxicloroquina, remdesivir, interferón, tocilizumab, azitromicina y corticoides), mortalidad y complicaciones hemorrágicas y trombóticas.

Como parte de las complicaciones registradas se consideraron como **complicaciones trombóticas**:

- Trombosis venosa sin tromboembolismo pulmonar.
- Embolismo arterial.
- Sospecha de tromboembolismo pulmonar basada en hipoxemia creciente y deterioro hemodinámico.
- Tromboembolismo pulmonar confirmado por técnica de imagen o por necropsia.
- Accidente isquémico transitorio.
- Ictus isquémico.
- Síndrome coronario agudo.

Como parte de las complicaciones registradas se consideraron como **complicaciones hemorrágicas mayores**:

- Hemorragia fatal.
- Hemorragia asociada con disminución de hemoglobina mayor de 2 g/dL.
- Hemorragia que requiere intervención quirúrgica.

Como parte de las complicaciones registradas se consideraron como **complicaciones hemorrágicas menores** todas las hemorragias que no cumplieron ningún criterio de hemorragia mayor.

## MATERIAL SUPLEMENTARIO -2: Complicaciones tromboticas y hemorrágicas.

Los pacientes que presentaron **complicaciones tromboticas** reunían las siguientes características:

|                                        | PROFILAXIS<br>(N = 20) | TRATAMIENTO<br>(N = 49) | p      |
|----------------------------------------|------------------------|-------------------------|--------|
| Estancia en UCI (días)                 | 16,5 (8-31,25)         | 21 (14-34)              | 0,292  |
| Días de síntomas hasta ingreso en UCI  | 10 (6-13)              | 9 (6-13)                | 0,547  |
| Días de síntomas hasta hospitalización | 8 (5-12)               | 6 (4-8)                 | 0,658  |
| Edad                                   | 62 (56-71)             | 64 (55-70,5)            | 0,196  |
| Sexo: Hombres                          | 90%                    | 86%                     | 1      |
| Índice de masa corporal                | 28 (24,5-32,5)         | 28 (26-31)              | 0.803  |
| Escala APACHE                          | 9 (6,25-14,25)         | 11 (8-14)               | 0,775  |
| Escala SOFA                            | 9 (6,25-14,25)         | 8 (5,75-10)             | 0,228  |
| Relación PaO2/FiO2                     | 100-200 (100-486)      | 100-200 (100-486)       | 0,112  |
| Ferritina                              | 1174 (794-2232)        | 1453 (823-3285)         | 0,38   |
| Dímero D                               | 5700 (2450-10610)      | 7275 (1100-33517)       | 0,177  |
| PCR                                    | 18,7 (9,2-29,74)       | 38,5 (19,59-162,08)     | <0,001 |
| Recuento linfocitario                  | 0,75 (0,57-1,19)       | 0,7 (0,51-1,105)        | 0,388  |
| Relación PCR/recuento linfocitario     | 26,43 (7,02-38,31)     | 66,67 (20,97-303)       | <0,001 |
| Plaquetas                              | 267,5 (198,25-388,25)  | 260 (204-328,5)         | 0,768  |
| LDH                                    | 541 (482-954)          | 688 (573-1039)          | 0,552  |
| Procalcitonina                         | 0,5 (0,13-2,74)        | 1,01 (0,4-5,86)         | 0,067  |
| Aclaramiento de creatinina             | 77,64 (29,46-100,25)   | 78,50 (48,61-111,54)    | 0,443  |
| Oxígeno alto flujo al ingreso          | 5%                     | 8%                      | 0,321  |
| Ventilación mecánica                   | 60%                    | 90%                     | <0,001 |
| <3 días de ingreso                     | 92%                    | 91%                     |        |
| >2 días de ingreso                     | 8%                     | 9%                      |        |
| Maniobras de reclutamiento             | 40%                    | 65%                     | <0,001 |
| <3 días de ingreso                     | 62%                    | 66%                     |        |
| >2 días de ingreso                     | 38%                    | 34%                     |        |
| Sesiones de decúbito prono             | 40%                    | 84%                     | <0,001 |
| <3 días de ingreso                     | 62%                    | 80%                     |        |
| >2 días de ingreso                     | 38%                    | 20%                     |        |
| ECMO                                   | 0%                     | 6%                      | 0,569  |
| Extracción extracorpórea de CO2        | 5%                     | 0%                      | 0,742  |
| Técnicas de depuración extrarrenal     | 10%                    | 16%                     | 0,559  |
| Relajantes neuromusculares             | 50%                    | 84%                     | <0,001 |
| Tratamiento antiviral                  | 65%                    | 59%                     | 0,967  |
| Hidroxiclороquina                      | 95%                    | 90%                     | 0,109  |
| Remdesivir                             | 5%                     | 2%                      | 0,179  |
| Interferón                             | 30%                    | 34%                     | 0,301  |
| Tocilizumab                            | 50%                    | 57%                     | 0,006  |
| Inmunomoduladores                      | 70%                    | 57%                     | 0,122  |
| Azitromicina                           | 80%                    | 76%                     | 0,63   |
| Corticoides                            | 75%                    | 78%                     | 0,053  |

|                                                      |                  |                  |       |
|------------------------------------------------------|------------------|------------------|-------|
| Soporte hemodinámico                                 | 100%             | 100%             | 0,192 |
| Dosis de noradrenalina                               | 0,25 (0,11-0,63) | 0,21 (0,14-0,43) | 0,432 |
| Tratamiento antiagregante                            | 20%              | 8%               | 0,207 |
| Tratamiento anticoagulante                           | 10%              | 6%               | 0,976 |
| Tratamiento antiagregante y anticoagulante combinado | 25%              | 14%              | 0,272 |
| Tipo de complicación trombótica:                     |                  |                  |       |
| Tromboembolismo venoso                               | 5%               | 35%              | 0,265 |
| Embolismo pulmonar                                   | 85%              | 57%              |       |
| Ictus isquémico                                      | --               | 2%               |       |
| Oclusión arterial aguda                              | 10%              | 2%               |       |
| Síndrome coronario agudo                             | --               | 4%               |       |
| Mortalidad                                           | 20%              | 31%              | 0,008 |

Los datos se presentan como la mediana [RIQ] para variables continuas o como n (%) para variables dicotómicas.

PCR: Proteína C Reactiva; UCI: Unidad de cuidados intensivos

Los pacientes que presentaron **complicaciones hemorrágicas** tenían las siguientes características:

|                                             | PROFILAXIS<br>(N = 25) | TRATAMIENTO<br>(N = 41) | p      |
|---------------------------------------------|------------------------|-------------------------|--------|
| Estancia en UCI (días)                      | 28,6 (19,5-39)         | 26 (13-39,5)            | 0,292  |
| Días de síntomas hasta ingreso en UCI       | 10 (7-13)              | 10 (7-14,75)            | 0,547  |
| Días de síntomas hasta hospitalización      | 6 (4-10,5)             | 6 (4-9)                 | 0,658  |
| Edad                                        | 67 (61-71)             | 68 (60-73)              | 0,196  |
| Sexo: Hombres (%)                           | 80%                    | 75%                     | 1      |
| Índice de masa corporal                     | 29 (26-33)             | 29 (25-32)              | 0,803  |
| Escala APACHE II                            | 14 (9-17)              | 12 (8-19)               | 0,775  |
| Escala SOFA                                 | 7 (6-10)               | 7 (5-9)                 | 0,228  |
| Relación PaO <sub>2</sub> /FiO <sub>2</sub> | 100-200 (100-486)      | 100-200 (100-486)       | 0,112  |
| Ferritina                                   | 1436 (596-17538)       | 1650 (819-5532)         | 0,38   |
| Dímero D                                    | 3301 (1045-5650)       | 2850 (1283-10968)       | 0,177  |
| PCR                                         | 14 (7,83-79,62)        | 149 (22,13-295,65)      | <0,001 |
| Recuento linfocitario                       | 0,69 (0,4-0,9)         | 0,58 (0,4-1,07)         | 0,388  |
| Relación PCR/recuento linfocitario          | 28,86 (7,90-82,42)     | 115,61 (30,71-417)      | <0,001 |
| Plaquetas                                   | 280 (218-425)          | 319 (213-1920)          | 0,768  |
| LDH                                         | 590 (475-954)          | 985 (573-3420)          | 0,552  |
| Procalcitonina                              | 1,17 (0,26-6,83)       | 1,95 (0,55-6,64)        | 0,067  |
| Aclaramiento de creatinina                  | 56 (26-75)             | 37 (20-62)              | 0,443  |
| Oxigenoterapia alto flujo al ingreso        | 4%                     | 2%                      | 0,321  |
| Ventilación mecánica                        | No 16%                 | No 7%                   | <0,001 |
| <3 días de ingreso                          | 76%                    | 83%                     |        |
| >2 días de ingreso                          | 8%                     | 10%                     |        |
| Maniobras de reclutamiento                  | No 36%                 | No 24%                  | <0,001 |
| <3 días de ingreso                          | 36%                    | 66%                     |        |
| >2 días de ingreso                          | 28%                    | 10%                     |        |

|                                                                        |                        |                        |        |
|------------------------------------------------------------------------|------------------------|------------------------|--------|
| Sesiones de decúbito prono<br><3 días de ingreso<br>>2 días de ingreso | No 36%<br>36%<br>28%   | No 12%<br>81%<br>7%    | <0,001 |
| Extracción extracorpórea de CO2                                        | 12%                    | 0%                     | 0,742  |
| Técnicas de depuración extrarrenal                                     | 20%                    | 27%                    | 0,559  |
| Relajantes neuromusculares                                             | 76%                    | 85%                    | <0,001 |
| Tratamiento antiviral                                                  | 52%                    | 54%                    | 0,967  |
| Hidroxiclороquina                                                      | 84%                    | 85%                    | 0,109  |
| Remdesivir                                                             | 0%                     | 2%                     | 0,179  |
| Interferón                                                             | 12%                    | 29%                    | 0,301  |
| Tocilizumab                                                            | 40%                    | 56%                    | 0,006  |
| Inmunomoduladores                                                      | 48%                    | 68%                    | 0,122  |
| Azitromicina                                                           | 72%                    | 73%                    | 0,63   |
| Corticoides<br><3 días de ingreso<br>>2 días de ingreso                | No 20%<br>60%<br>20%   | No 5%<br>66%<br>29%;   | 0,053  |
| Soporte hemodinámico                                                   | 100%                   | 100%                   | 0,192  |
| Dosis de noradrenalina                                                 | 0,3 (0,2-0,8)          | 0,42 (0,1-0,7)         | 0,432  |
| Tratamiento antiagregante                                              | 20%                    | 7%                     | 0,207  |
| Tratamiento anticoagulante                                             | 28%                    | 7%                     | 0,976  |
| Tratamiento antiagregante y anticoagulante combinado                   | 28%                    | 12%                    | 0,272  |
| Tipo de complicación hemorrágica                                       | Mayor 36%<br>Menor 64% | Mayor 48%<br>Menor 51% | 0,265  |
| Mortalidad                                                             | 36%                    | 46%                    | 0,008  |

Los datos se presentan como la mediana [RIQ] para variables continuas o como n (%) para variables dicotómicas.

PCR: Proteína C Reactiva; UCI: Unidad de cuidados intensivos

### MATERIAL SUPLEMENTARIO -3: CAUSAS DE MORTALIDAD

Se estudian las causas de mortalidad según los datos recogidos en el registro RegCovid19 de la red UCI española que formó parte del estudio.

Del total de pacientes analizado (n=720 pacientes), 258 pacientes (35,83%) estaban en el grupo de HBPM a dosis profiláctica y 462 pacientes (64,16%) en el grupo de HBPM a dosis terapéutica (p=0,06) en relación con el estado clínico más severo en el grupo de HBPM a dosis terapéutica, sin relación entre la mortalidad y las dosis de anticoagulación como se describe en el artículo.

De los pacientes tratados con dosis profilácticas de HBPM, 193 (74,8%) sobrevivieron, mientras que 299 (64,7%) lo hicieron en el grupo tratado con dosis terapéuticas de HBPM.

En este registro se incluyeron 6 categorías de causas de mortalidad. La comparación entre causas de fallecimiento y grupos de tratamiento según dosis de anticoagulación no encontró diferencias significativas (p=0,097).

En 114 pacientes de 227 (50%) no se identificó la causa del fallecimiento. Esto supone una limitación para el análisis estadístico de las causas de mortalidad.

El registro recoge las respuestas a la causa de fallecimiento como una pregunta con múltiples opciones de respuesta, que incluyen las siguientes (los porcentajes se refieren al total de las respuestas recogidas como causa de fallecimiento):

1. Hipoxemia refractaria (2,63%): se considera como causa de fallecimiento la hipoxemia progresiva y refractaria al tratamiento medida con pulsioximetría y como descenso progresivo de pO<sub>2</sub> no explicado por otra condición. Incluye 2 pacientes (1,75%) en el grupo de tratamiento con dosis profilácticas de HBPM y 1 paciente (0,87%) en el grupo de tratamiento con dosis terapéuticas de HBPM.
2. Insuficiencia cardíaca (9,69%): 3 pacientes (2,63%) en el grupo de tratamiento con dosis profilácticas de HBPM y 8 pacientes (7,01%) en el grupo de tratamiento de dosis terapéuticas de HBPM.
3. Shock séptico (42,98%): 16 pacientes (14,03%) en el grupo de tratamiento con dosis profilácticas de HBPM y 33 pacientes (28,9%) en el grupo de tratamiento con dosis terapéuticas de HBPM.
4. Fracaso multiorgánico (27,19%): 3 pacientes (2,63%) en el grupo de tratamiento con dosis profilácticas de HBPM y 28 pacientes (24,56%) en el grupo de tratamiento con dosis terapéuticas de HBPM.
5. Limitación del esfuerzo terapéutico (15,79%): 6 pacientes (5,26%) en el grupo de tratamiento con dosis profilácticas de HBPM y 12 pacientes (10,52%) en el grupo de tratamiento con dosis terapéuticas de HBPM.
6. Parada cardíaca: ningún paciente incluido en esta categoría.

7. Otros: un único paciente se incluye en este grupo (0,88%). Su muerte se relaciona con una hemorragia fatal y pertenece al grupo de tratamiento con dosis profilácticas de HBPM.

Puede observarse que la causa de fallecimiento más frecuente tanto en el grupo de tratamiento con dosis profilácticas de HBPM como en el grupo con dosis terapéuticas es el shock séptico.

MORTALITY CAUSE (N: 227)

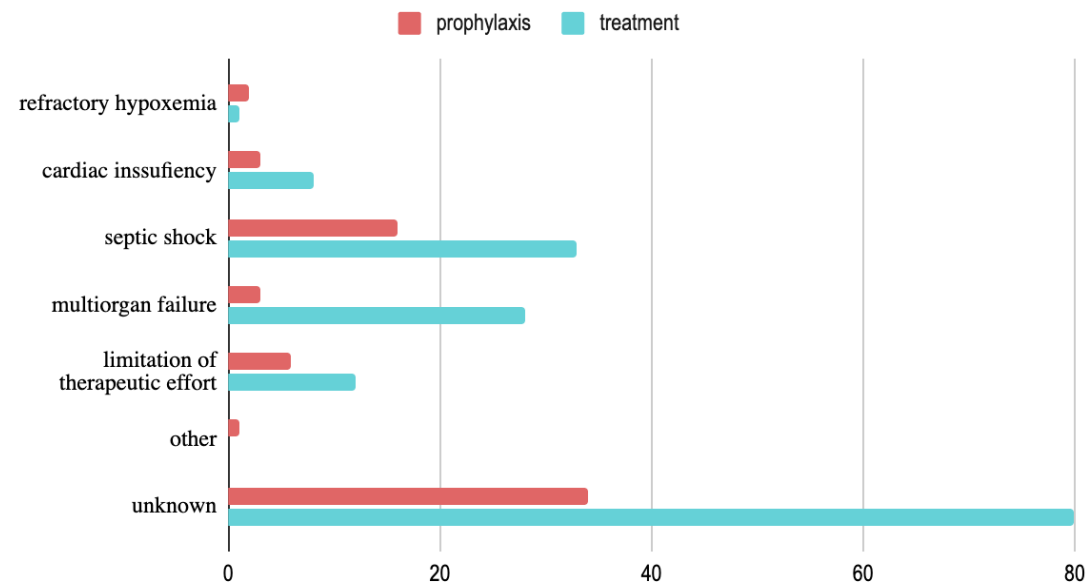

Mean Hospital Stay (days) over Date of Admission. No Survivors

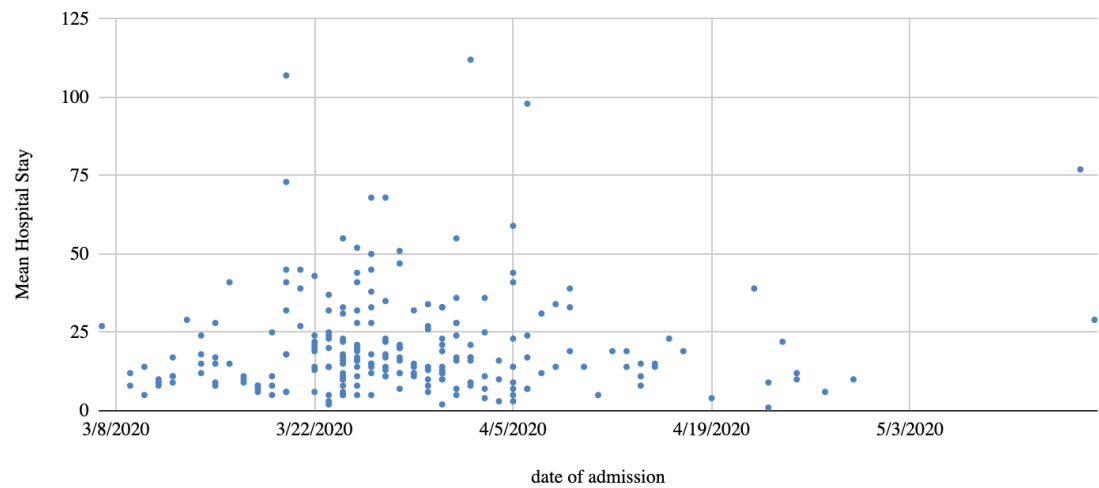

Supplement: mmc1 [file S0034935622000597:mmc1.pdf]
